# Supplementary material for: Multimethod U–Pb baddeleyite dating: insights from the Spread Eagle Intrusive Complex and Cape St. Mary's sills, Newfoundland, Canada
Source: Copernicus journal article supplement (doi:10.5194/gchron-2-187-2020), 2020-07-08
Supplement: Supplementary file 2 [file gchron-2-187-2020-supplement.zip]

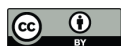

## *Supplement of*

# **Multimethod U–Pb baddeleyite dating: insights from the Spread Eagle Intrusive Complex and Cape St. Mary’s sills, Newfoundland, Canada**

**Johannes E. Pohlner et al.**

*Correspondence to:* Johannes E. Pohlner ([johannes.pohlner@unifr.ch](mailto:johannes.pohlner@unifr.ch))

- [gchron-2-187-2020-supplement-title-page.pdf](#)
- [Supplementary Tables.xlsx](#)
- [Supplements.pdf](#)

The copyright of individual parts of the supplement might differ from the CC BY 4.0 License.
